# Supplementary material
Source: PubMed Central journal article supplement (PMC3716111)
Supplement: JCM.03201-12_zjm999092555so1.pdf [file JCM.03201-12_zjm999092555so1.pdf]

|               |                                                                                  |     |
|---------------|----------------------------------------------------------------------------------|-----|
| Majority      | TTACCGTGGATGTGGCTTCTTGGGAGTAATCTTGCCTCCTTTGCTTAAAGTCAAGGGATTGATTTAATTGTATTCGAT   |     |
|               | 10 20 30 40 50 60 70 80                                                          |     |
| S5483tyvD.seq | .....                                                                            | 80  |
| s5439tyvD.seq | .....                                                                            | 89  |
| s5415tyvD.seq | .....                                                                            | 94  |
| s5406tyvD.seq | .....                                                                            | 94  |
| S5395tyvD.seq | .....                                                                            | 80  |
| R6540tyvD.seq | .....C.....                                                                      | 82  |
| Majority      | AATCTATCACGTAAGGTGCAACAGATAATTTACATTGGTTATCCTCCTTAGGAACTTTGAGTTTGTACATGGTGATAT   |     |
|               | 90 100 110 120 130 140 150 160                                                   |     |
| S5483tyvD.seq | .....                                                                            | 160 |
| s5439tyvD.seq | .....                                                                            | 169 |
| s5415tyvD.seq | .....                                                                            | 174 |
| s5406tyvD.seq | .....                                                                            | 174 |
| S5395tyvD.seq | .....                                                                            | 160 |
| R6540tyvD.seq | .....                                                                            | 162 |
| Majority      | TCGCAACAAAATGATGTTACAAGATTAACTAAGTATATGCCTGATAGCTGTTTTTCATCTTGCAGGTCAAGTGGCAA    |     |
|               | 170 180 190 200 210 220 230 240                                                  |     |
| S5483tyvD.seq | .....                                                                            | 240 |
| s5439tyvD.seq | .....                                                                            | 249 |
| s5415tyvD.seq | .....                                                                            | 254 |
| s5406tyvD.seq | .....                                                                            | 254 |
| S5395tyvD.seq | .....                                                                            | 240 |
| R6540tyvD.seq | .....                                                                            | 242 |
| Majority      | TGACTACATCTATTGACAATCCTTGTATGGATTTGAAATTAATGTAGGTGGAACTTTAAATTTACTTGAGGCAGTACGG  |     |
|               | 250 260 270 280 290 300 310 320                                                  |     |
| S5483tyvD.seq | .....                                                                            | 320 |
| s5439tyvD.seq | .....                                                                            | 329 |
| s5415tyvD.seq | .....                                                                            | 334 |
| s5406tyvD.seq | .....                                                                            | 334 |
| S5395tyvD.seq | .....                                                                            | 320 |
| R6540tyvD.seq | .....                                                                            | 322 |
| Majority      | CAGTATAATTCAAATTGTAATATAATTTATTCATCAACAAAATAAGTATACGGCGATCTTGAGCAATATAAATACAATGA |     |
|               | 330 340 350 360 370 380 390 400                                                  |     |
| S5483tyvD.seq | .....                                                                            | 400 |
| s5439tyvD.seq | .....                                                                            | 409 |
| s5415tyvD.seq | .....                                                                            | 414 |
| s5406tyvD.seq | .....                                                                            | 414 |
| S5395tyvD.seq | .....                                                                            | 400 |
| R6540tyvD.seq | .....                                                                            | 402 |
| Majority      | AACAGAACTAGATATACTTGTATAGATAAGCCATAATGGATATGATGAGAGCACACAATTAGATTTCCACTCACCATATG |     |
|               | 410 420 430 440 450 460 470 480                                                  |     |
| S5483tyvD.seq | .....                                                                            | 480 |
| s5439tyvD.seq | .....                                                                            | 489 |
| s5415tyvD.seq | .....                                                                            | 494 |
| s5406tyvD.seq | .....                                                                            | 494 |
| S5395tyvD.seq | .....                                                                            | 480 |
| R6540tyvD.seq | .....C.....G.....                                                                | 482 |
| Majority      | GTTGTTCAAAAGGTGCTGCAGATCAATACATGCTTGATTATGCAAGGATTTT                             |     |
|               | 490 500 510 520 530                                                              |     |
| S5483tyvD.seq | .....                                                                            | 532 |
| s5439tyvD.seq | .....                                                                            | 541 |
| s5415tyvD.seq | .....                                                                            | 546 |
| s5406tyvD.seq | .....                                                                            | 546 |
| S5395tyvD.seq | .....                                                                            | 532 |
| R6540tyvD.seq | .....C.....                                                                      | 534 |

**Figure S1** Alignment of 532 nt from *tyvD* for 6 serogroup O:9 (D1) isolates representing common serovars. Left hand label includes isolate identification information, e.g., s5483tyvD is isolate FSL S5-483. Sequences and isolate information can be accessed at [www.foodmicrobetracker.com](http://www.foodmicrobetracker.com).

|                 |                                                                                 |     |
|-----------------|---------------------------------------------------------------------------------|-----|
| Majority        | TATTATTTATTAGTAGTACAGTTGATGGGAGTATTAATCTTGCTGAGCTAGGTATAAGTACAGCCTTAACATATATCCT |     |
|                 | 10 20 30 40 50 60 70 80                                                         |     |
| R6938wzxE4.seq  | .....                                                                           | 82  |
| R83404wzxE1.seq | .....                                                                           | 80  |
| R83408wzxE1.seq | .....                                                                           | 82  |
| S5438wzxE1.seq  | .....                                                                           | 82  |
| S5487wzxE1.seq  | .....C.....                                                                     | 82  |
| s5432wzxE1.seq  | .....C.....                                                                     | 109 |
| s5540wzxE1.seq  | .....                                                                           | 109 |
| s5658wzxE1.seq  | .....                                                                           | 109 |
| Majority        | ATTTAAACCACTGCATAGAAAAGAAAATAGTGAGTTAAGACAATTATATTTTATAATAAGAAAATATACCATTTTATAG |     |
|                 | 90 100 110 120 130 140 150 160                                                  |     |
| R6938wzxE4.seq  | .....                                                                           | 162 |
| R83404wzxE1.seq | .....                                                                           | 160 |
| R83408wzxE1.seq | .....                                                                           | 162 |
| S5438wzxE1.seq  | .....                                                                           | 162 |
| S5487wzxE1.seq  | .....                                                                           | 162 |
| s5432wzxE1.seq  | .....T.....                                                                     | 189 |
| s5540wzxE1.seq  | .....                                                                           | 189 |
| s5658wzxE1.seq  | .....                                                                           | 189 |
| Majority        | CATTGGGCATATTAGTTATTGGACTACTTTTCTTTTGTATTAAATCTATAGTAAATGCAAGTATATCCCCTGAAAAAT  |     |
|                 | 170 180 190 200 210 220 230 240                                                 |     |
| R6938wzxE4.seq  | .....                                                                           | 242 |
| R83404wzxE1.seq | .....                                                                           | 240 |
| R83408wzxE1.seq | .....                                                                           | 242 |
| S5438wzxE1.seq  | .....                                                                           | 242 |
| S5487wzxE1.seq  | .....G.....                                                                     | 242 |
| s5432wzxE1.seq  | .....G.....                                                                     | 269 |
| s5540wzxE1.seq  | .....                                                                           | 269 |
| s5658wzxE1.seq  | .....                                                                           | 269 |
| Majority        | CTATATATAACATGGGGGGTGGTTGTATAAGTACATCATTATCATATTTTATACTCTGCTCA                  |     |
|                 | 250 260 270 280 290 300                                                         |     |
| R6938wzxE4.seq  | .....A.....                                                                     | 304 |
| R83404wzxE1.seq | .....                                                                           | 302 |
| R83408wzxE1.seq | .....C.....C.....                                                               | 304 |
| S5438wzxE1.seq  | .....                                                                           | 304 |
| S5487wzxE1.seq  | .....                                                                           | 304 |
| s5432wzxE1.seq  | .....                                                                           | 331 |
| s5540wzxE1.seq  | .....                                                                           | 331 |
| s5658wzxE1.seq  | .....A.....                                                                     | 331 |

**Figure S2** Alignment of 302 nt fragment from *wzx* for 7 serogroup O:3,10 (E1) isolates and 1 serogroup O:1,3,19 (E4) isolate. Left hand label includes isolate identification information, e.g., R6938wzxE4 is isolate FSL R6-938, representing serogroup E4. Sequences and isolate information can be accessed at [www.foodmicrobetracker.com](http://www.foodmicrobetracker.com).



**TABLE S2** PCR conditions used for serogroup, *fljC* and *fljB* amplification<sup>a</sup>

| Primer Set        | Primer Conc.<br>( $\mu$ M) | Start ( $^{\circ}$ C, min) | 30 cycles of <sup>b</sup>       |                              |                              | Final Extension ( $^{\circ}$ C, min) |
|-------------------|----------------------------|----------------------------|---------------------------------|------------------------------|------------------------------|--------------------------------------|
|                   |                            |                            | Denaturation ( $^{\circ}$ C, s) | Annealing ( $^{\circ}$ C, s) | Extension ( $^{\circ}$ C, s) |                                      |
| Multiplex PCR     | 0.2                        | 95, 10                     | 95, 30                          | 58, 30                       | 72, 45                       | 72, 7                                |
| Serogroup Set 1   | 0.5                        | 95, 10                     | 94, 30                          | 48, 60                       | 72, 90                       | 72, 7                                |
| Serogroup Set 2   | 0.5                        | 95, 10                     | 94, 30                          | 58, 30                       | 72, 45                       | 72, 7                                |
| <i>fljC</i> Set 1 | 0.5                        | 95, 10                     | 95, 30                          | 59, 30 <sup>c</sup>          | 72, 90                       | 72, 7                                |
| <i>fljC</i> Set 2 | 0.5                        | 95, 10                     | 95, 30                          | 70, 60 <sup>d</sup>          | 72, 90                       | 72, 7                                |
| <i>fljB</i> Set 1 | 0.5                        | 95, 10                     | 95, 60                          | 65, 30 <sup>e</sup>          | 72, 90                       | 72, 7                                |
| <i>fljB</i> Set 2 | 0.4                        | 95, 10                     | 95, 30                          | 58, 30                       | 72, 90                       | 72, 7                                |

<sup>a</sup>Each 25  $\mu$ L PCR reaction also contained: 1X PCR buffer, 1.5 mM MgCl<sub>2</sub>, 0.4 mM of each dNTP, 0.625 units of AmpliTaq Gold 360 DNA Polymerase, and 25 ng of purified *Salmonella* DNA. Refer to Table 1 for additional primer information.

<sup>b</sup>All PCRs were stored at 4 $^{\circ}$ C after the final extension step.

<sup>c</sup>Touchdown at -0.5 $^{\circ}$ C per cycle for 20 cycles, followed by 20 cycles at 49 $^{\circ}$ C.

<sup>d</sup>Touchdown at -0.5 $^{\circ}$ C per cycle for 20 cycles, followed by 20 cycles at 60 $^{\circ}$ C.

<sup>e</sup>Touchdown at -0.5 $^{\circ}$ C per cycle for 20 cycles, followed by 20 cycles at 55 $^{\circ}$ C.

TABLE S3 Results for subtyping methods evaluated for their ability to predict *Salmonella* serovars in 46 isolates representing 40 common serovars.

| Serovar                         | Isolate     | Serovar predicted by                        |                                                    |                                                   |                                      | Molecular Serotyping  |
|---------------------------------|-------------|---------------------------------------------|----------------------------------------------------|---------------------------------------------------|--------------------------------------|-----------------------|
|                                 |             | PFGE<br>(band difference from most similar) | Rep-PCR<br>(DiversiLab % identity to top match)    | Ribotyping<br>(DuPont ID % identity to top match) | MLST                                 |                       |
| Typhimurium                     | FSL S5-536  | Typhimurium (0)                             | Typhimurium (94.4)                                 | Typhimurium (94)                                  | Typhimurium                          | Typhimurium           |
| Enteritidis                     | FSL S5-433  | 4.5,12:1- (0)                               | 4.5,12:1- (96.9)                                   | Typhimurium (97)                                  | Typhimurium                          | 4.5,12:1-             |
| Enteritidis                     | FSL S5-415  | Enteritidis (0)                             | Enteritidis (97.1)                                 | Enteritidis (95)                                  | Enteritidis                          | Enteritidis           |
| Enteritidis                     | FSL S5-483  | Enteritidis (0)                             | Enteritidis (98.5)                                 | Enteritidis (96)                                  | Enteritidis                          | Enteritidis           |
| Newport                         | FSL S5-639  | Newport (0)                                 | Newport (97.4)                                     | Newport (94), Bardo (94)                          | Newport                              | Newport               |
| Heidelberg                      | FSL S5-436  | Newport (0)                                 | Newport (94.6)                                     | Newport (93)                                      | Newport                              | Newport               |
| Heidelberg                      | FSL S5-448  | Heidelberg (0)                              | Heidelberg (96.3)                                  | Heidelberg (98)                                   | Heidelberg                           | Heidelberg            |
| Heidelberg                      | FSL S5-480  | Heidelberg (1)                              | Heidelberg (97)                                    | Heidelberg (96)                                   | Heidelberg                           | Heidelberg            |
| Javiana                         | FSL S5-395  | Javiana (0)                                 | Javiana (86.5)                                     | Binza (93), Orion (93), Tomasville (93)           | Javiana                              | Javiana               |
| Javiana                         | FSL S5-406  | Javiana (0)                                 | Mississippi (72.3)                                 | Javiana (96)                                      | Javiana                              | Javiana               |
| 4.5,12:1-                       | FSL S5-580  | 4.5,12:1- (0)                               | 4.5,12:1- (96.9)                                   | Typhimurium (93)                                  | Typhimurium                          | Typhimurium           |
| Montevideo                      | FSL S5-630  | Montevideo (1)                              | Montevideo (98.2)                                  | Unidentified (< 70)                               | Montevideo                           | Montevideo            |
| Muenchen                        | FSL S5-504  | Muenchen (1)                                | Muenchen (94.9)                                    | Muenchen (97)                                     | Muenchen                             | Muenchen              |
| Oranienburg                     | FSL S5-642  | Oranienburg (0)                             | Oranienburg (96.9)                                 | Oranienburg (95)                                  | Oranienburg                          | Oranienburg           |
| Mississippi                     | FSL A4-633  | Unidentified (> 3)                          | Mississippi (92.9)                                 | Mississippi (88), Minnesota (88)                  | Mississippi                          | Mississippi           |
| Saintpaul                       | FSL S5-649  | Typhimurium (2)                             | Saintpaul (94.6)                                   | Saintpaul (95)                                    | Saintpaul                            | Saintpaul             |
| Braenderup                      | FSL S5-373  | Braenderup (0)                              | Braenderup (97.3)                                  | Braenderup (96)                                   | Braenderup                           | Braenderup            |
| Agona                           | FSL S5-517  | Agona (1)                                   | Agona (98.4)                                       | Agona (88)                                        | Agona                                | Agona                 |
| Infantis                        | FSL S5-734  | Infantis (0)                                | Typhimurium (95.3)                                 | Infantis (93)                                     | Infantis                             | Infantis              |
| Thompson                        | FSL S5-523  | Thompson (0)                                | Thompson (96.3)                                    | Thompson (95)                                     | Thompson                             | Thompson              |
| Paratyphi B var. Java           | FSL S5-447  | Paratyphi B var. Java (0)                   | 4.5,12:1- (96.5)                                   | Paratyphi B (71)                                  | Paratyphi B var. Java                | Paratyphi B var. Java |
| Typhi                           | FSL R6-540  | Typhi (0)                                   | Typhi (94.5)                                       | Unidentified (< 70)                               | Typhi                                | Typhi                 |
| Stanley                         | FSL S5-408  | Stanley (1)                                 | Senftenberg (89.6)                                 | Stanley (96)                                      | Stanley                              | Stanley               |
| Tennessee                       | FSL R8-1965 | Tennessee (0)                               | Tennessee (95)                                     | Tennessee (81)                                    | Tennessee                            | Tennessee             |
| Hadar                           | FSL S5-543  | Hadar (0)                                   | Hadar (97.2)                                       | Hadar (91)                                        | Hadar                                | Hadar                 |
| Virchow                         | FSL S5-961  | Unidentified (> 3)                          | Bareilly (94.2)                                    | Virchow (96)                                      | Virchow                              | Virchow               |
| Blockley                        | FSL S5-648  | Blockley (2)                                | Blockley (97.2)                                    | Haardt (92)                                       | Blockley                             | Blockley              |
| Anatum                          | FSL S5-540  | Anatum (0)                                  | Anatum (92.3)                                      | Anatum (97), Newington (97)                       | Anatum                               | Anatum                |
| Weltevreden                     | FSL S5-438  | Unidentified (> 3)                          | Berta (82.8)                                       | Weltevreden (90)                                  | Weltevreden                          | Weltevreden           |
| Orion var. 15+, 34+             | FSL R8-3408 | Unidentified (> 3)                          | Thompson (96.4)                                    | Paratyphi B (93)                                  | Serotype not identified <sup>a</sup> | Orion var. 15+, 34+   |
| Dublin                          | FSL S5-439  | Dublin (0)                                  | Dublin (87.1)                                      | Enteritidis (97), San Diego (97)                  | Dublin                               | Dublin                |
| Derby                           | FSL R8-2630 | Derby (0)                                   | Hadar (93)                                         | Derby (98)                                        | Derby                                | Derby                 |
| Senftenberg                     | FSL S5-658  | Senftenberg (1)                             | Schwarzengrund (96.2)                              | Senftenberg (97)                                  | Senftenberg                          | Senftenberg           |
| Kentucky                        | FSL S5-273  | Kentucky (0)                                | Blockley (91.6)                                    | Kentucky (95)                                     | Kentucky                             | Kentucky              |
| Kentucky                        | FSL S5-431  | Kentucky (0)                                | R8,20:-z6 (96.9)                                   | Kentucky (92)                                     | Kentucky                             | Kentucky              |
| Muenster                        | FSL S5-432  | Muenster (0)                                | Javiana (96.2)                                     | Lomita (91)                                       | Muenster                             | Muenster              |
| Mbandaka                        | FSL S5-451  | Mbandaka (1)                                | Mbandaka (93.2)                                    | Mbandaka (93)                                     | Mbandaka                             | Mbandaka              |
| Cerro                           | FSL R8-370  | Cerro (0)                                   | Cerro (95.4)                                       | Cerro (88)                                        | Cerro                                | Cerro                 |
| Choleraesuis                    | FSL R8-3632 | Unidentified (> 3)                          | Lichfield (95.2); Choleraesuis (95.0) <sup>c</sup> | Choleraesuis (88)                                 | Choleraesuis var. Kunzendorf         | 6,7:c-                |
| Reading                         | FSL R8-1987 | Unidentified (> 3)                          | Bareilly (94.6)                                    | Reading (93)                                      | Serotype not identified <sup>a</sup> | Reading               |
| Melagris                        | FSL R6-938  | Melagris (0)                                | Melagris (96.5)                                    | Melagris (94)                                     | Melagris                             | Melagris              |
| Uganda                          | FSL R8-3404 | Uganda (1)                                  | Uganda (95.6)                                      | Enteritidis (90)                                  | Uganda                               | Uganda                |
| Schwarzengrund                  | FSL S5-458  | Schwarzengrund (0)                          | Schwarzengrund (97.7)                              | Schwarzengrund (95), Bredenev (95)                | Schwarzengrund                       | Schwarzengrund        |
| Give                            | FSL S5-487  | Unidentified (> 3)                          | Oranienburg (96.6)                                 | Absetenba (88)                                    | Give                                 | Give                  |
| Worthington                     | FSL S5-490  | Unidentified (> 3)                          | Worthington (87.5)                                 | Worthington (96)                                  | Worthington                          | Worthington           |
| Typhimurium var. 5 <sup>a</sup> | FSL S5-786  | Typhimurium (0); T. Copenhagen (0)          | Typhimurium (96.4)                                 | Typhimurium (76)                                  | Typhimurium                          | Typhimurium           |

<sup>a</sup>MLST identified an existing sequence type, but isolates for that sequence type available in the database lacked serotype information.

<sup>b</sup>S. Typhimurium var. 5- was formerly S. Typhimurium var. Copenhagen.

<sup>c</sup>Examination of rep-PCR patterns indicated S. Choleraesuis was a better match to isolate FSL R8-3632

**TABLE S4** Summary of the Max Planck 7-gene MLST for the 'top 40' *Salmonella* serovars

| Serovar                 | FSL number  | <i>aroC</i> AT | <i>dnaN</i> AT | <i>hemD</i> AT   | <i>hisD</i> AT   | <i>purE</i> AT | <i>sucA</i> AT   | <i>thrA</i> AT | ST                | Serovar predicted by MLST    |
|-------------------------|-------------|----------------|----------------|------------------|------------------|----------------|------------------|----------------|-------------------|------------------------------|
| Typhimurium             | FSL S5-433  | 10             | 7              | 12               | 9                | 5              | 9                | 2              | 19                | Typhimurium                  |
| Typhimurium             | FSL S5-536  | 10             | 7              | 12               | 9                | 5              | 9                | 2              | 19                | Typhimurium                  |
| Enteritidis             | FSL S5-415  | 5              | 2              | 3                | 7                | 6              | 6                | 11             | 11                | Enteritidis                  |
| Enteritidis             | FSL S5-483  | 5              | 2              | 3                | 7                | 6              | 6                | 11             | 11                | Enteritidis                  |
| Newport                 | FSL S5-436  | 10             | 7              | 21               | 14               | 15             | 12               | 12             | 45                | Newport                      |
| Newport                 | FSL S5-639  | 16             | 43             | 45               | 43               | 36             | 39               | 42             | 5                 | Newport                      |
| Heidelberg              | FSL S5-448  | 2              | 7              | 9                | 9                | 5              | 9                | 12             | 15                | Heidelberg                   |
| Heidelberg              | FSL S5-480  | 2              | 7              | 9                | 9                | 5              | 9                | 12             | 15                | Heidelberg                   |
| Javiana                 | FSL S5-395  | 13             | 12             | 17               | 16               | 13             | 16               | 4              | 24                | Javiana                      |
| Javiana                 | FSL S5-406  | 13             | 12             | 17               | 520 <sup>a</sup> | 13             | 16               | 4              | 1674 <sup>a</sup> | Javiana                      |
| 4,5,12:i:-              | FSL S5-580  | 10             | 7              | 12               | 9                | 5              | 9                | 2              | 19                | Typhimurium                  |
| Montevideo              | FSL S5-630  | 11             | 41             | 55               | 42               | 34             | 58               | 12             | 1677 <sup>a</sup> | Montevideo                   |
| Muenchen                | FSL S5-504  | 41             | 9              | 21               | 12               | 8              | 37               | 17             | 83                | Muenchen                     |
| Oranienburg             | FSL S5-642  | 13             | 11             | 315 <sup>a</sup> | 15               | 12             | 15               | 4              | 1675 <sup>a</sup> | Oranienburg                  |
| Mississippi             | FSL A4-633  | 48             | 128            | 96               | 119              | 116            | 119              | 118            | 448               | Mississippi                  |
| Saintpaul               | FSL S5-649  | 5              | 21             | 18               | 9                | 6              | 12               | 17             | 50                | Saintpaul                    |
| Braenderup              | FSL S5-373  | 12             | 2              | 15               | 14               | 11             | 14               | 16             | 22                | Braenderup                   |
| Agona                   | FSL S5-517  | 3              | 3              | 7                | 4                | 3              | 3                | 7              | 13                | Agona                        |
| Infantis                | FSL S5-734  | 17             | 18             | 22               | 17               | 5              | 21               | 19             | 32                | Infantis                     |
| Thompson                | FSL S5-523  | 14             | 13             | 18               | 12               | 14             | 18               | 1              | 26                | Thompson                     |
| Paratyphi B var. Java   | FSL S5-447  | 46             | 44             | 46               | 46               | 38             | 18               | 34             | 88                | Paratyphi B var Java         |
| Typhi                   | FSL R6-540  | 1              | 1              | 1                | 1                | 1              | 1                | 5              | 1                 | Typhi                        |
| Stanley                 | FSL S5-408  | 16             | 16             | 20               | 18               | 8              | 12               | 18             | 29                | Stanley                      |
| Tennessee               | FSL R8-1965 | 118            | 107            | 8                | 51               | 2              | 117              | 16             | 319               | Tennessee                    |
| Hadar                   | FSL S5-543  | 2              | 5              | 6                | 7                | 5              | 7                | 12             | 33                | Hadar                        |
| Virchow                 | FSL S5-961  | 6              | 7              | 10               | 10               | 8              | 10               | 14             | 16                | Virchow                      |
| Blockley                | FSL S5-648  | 23             | 9              | 15               | 12               | 17             | 20               | 12             | 52                | Blockley                     |
| Anatum                  | FSL S5-540  | 10             | 14             | 15               | 31               | 25             | 20               | 33             | 64                | Anatum                       |
| Weltevreden             | FSL S5-438  | 130            | 97             | 25               | 125              | 84             | 9                | 101            | 365               | Weltevreden                  |
| Orion va. 15+,34+       | FSL R8-3408 | 99             | 175            | 58               | 11               | 111            | 9                | 2              | 639 <sup>b</sup>  | 639 serovar not in database  |
| Dublin                  | FSL S5-439  | 5              | 2              | 3                | 6                | 5              | 5                | 2              | 1673 <sup>a</sup> | Dublin                       |
| Derby                   | FSL R8-2630 | 39             | 35             | 8                | 36               | 29             | 9                | 36             | 71                | Derby                        |
| Senftenberg             | FSL S5-658  | 7              | 6              | 8                | 8                | 7              | 8                | 13             | 14                | Senftenberg                  |
| Kentucky                | FSL S5-273  | 76             | 14             | 3                | 77               | 64             | 64               | 67             | 198               | Kentucky                     |
| Kentucky                | FSL S5-431  | 62             | 53             | 54               | 60               | 5              | 53               | 54             | 152               | Kentucky                     |
| Muenster                | FSL S5-432  | 119            | 10             | 17               | 42               | 12             | 13               | 4              | 321               | Muenster                     |
| Mbandaka                | FSL S5-451  | 15             | 70             | 93               | 78               | 113            | 6                | 68             | 413               | Mbandaka                     |
| Cerro                   | FSL R8-370  | 14             | 112            | 43               | 123              | 118            | 115              | 120            | 367               | Cerro                        |
| Choleraesuis            | FSL R8-3632 | 34             | 31             | 35               | 14               | 26             | 6                | 8              | 66                | Choleraesuis var. Kunzendorf |
| Reading                 | FSL R8-1987 | 46             | 60             | 10               | 9                | 6              | 12               | 17             | 1628 <sup>b</sup> | 1628 serovar not in database |
| Meleagridis             | FSL R8-938  | 92             | 125            | 78               | 128              | 138            | 9                | 141            | 463               | Meleagridis                  |
| Uganda                  | FSL R8-3404 | 147            | 13             | 15               | 123              | 15             | 9                | 17             | 1676 <sup>a</sup> | Uganda                       |
| Schwarzengrund          | FSL S5-458  | 43             | 47             | 49               | 49               | 41             | 15               | 114            | 322               | Schwarzengrund               |
| Give                    | FSL S5-487  | 84             | 11             | 16               | 42               | 40             | 398 <sup>a</sup> | 4              | 1678 <sup>a</sup> | Give                         |
| Worthington             | FSL S5-490  | 189            | 70             | 68               | 132              | 175            | 9                | 172            | 592               | Worthington                  |
| T. var. 5- (Copenhagen) | FSL S5-786  | 10             | 7              | 12               | 9                | 5              | 9                | 2              | 19                | Typhimurium                  |

<sup>a</sup>Represents a new allelic type or sequence type that was submitted to the MLST database

<sup>b</sup>An existing sequence type was found in the MLST database, however, no serovar information was available for the isolate(s).
